# Supplementary material for: Rapid discovery of potent α-fucosidase inhibitors by in situ screening of a library of (pyrrolidin-2-yl)triazoles
Source: Royal Society of Chemistry journal article supplement (doi:10.1039/c4ob00931b), 2014-01-01
Supplement: c4ob00931b1.pdf [file c4ob00931b1.pdf]

## Supporting Information

### **Rapid discovery of potent $\alpha$ -fucosidase inhibitors by *in situ* screening of a library of (pyrrolidin-2-yl)triazoles**

Pilar Elías-Rodríguez, Elena Moreno-Clavijo, Ana T. Carmona, Antonio J. Moreno-Vargas\*  
and Inmaculada Robina

Department of Organic Chemistry, Faculty of Chemistry, University of Seville. C/ Prof. García  
González, 1, 41012-Seville, Spain.

ajmoreno@us.es

#### **Table of contents**

|                                                                                                                   |            |
|-------------------------------------------------------------------------------------------------------------------|------------|
| <b>1. Detailed scheme for <i>in situ</i> screening towards <math>\alpha</math>-fucosidases from bovine kidney</b> | <b>S2</b>  |
| <b>2. IC<sub>50</sub> and Lineweaver-Burk plots</b>                                                               | <b>S3</b>  |
| <b>3. Experimental details for the preparation of compound 6</b>                                                  | <b>S7</b>  |
| <b>4. Experimental details for the synthesis of azides a-u</b>                                                    | <b>S9</b>  |
| <b>5. Copies of <sup>1</sup>H- and <sup>13</sup>C-NMR spectra</b>                                                 | <b>S12</b> |

# 1. Detailed scheme for *in situ* screening towards $\alpha$ -fucosidases from bovine kidney

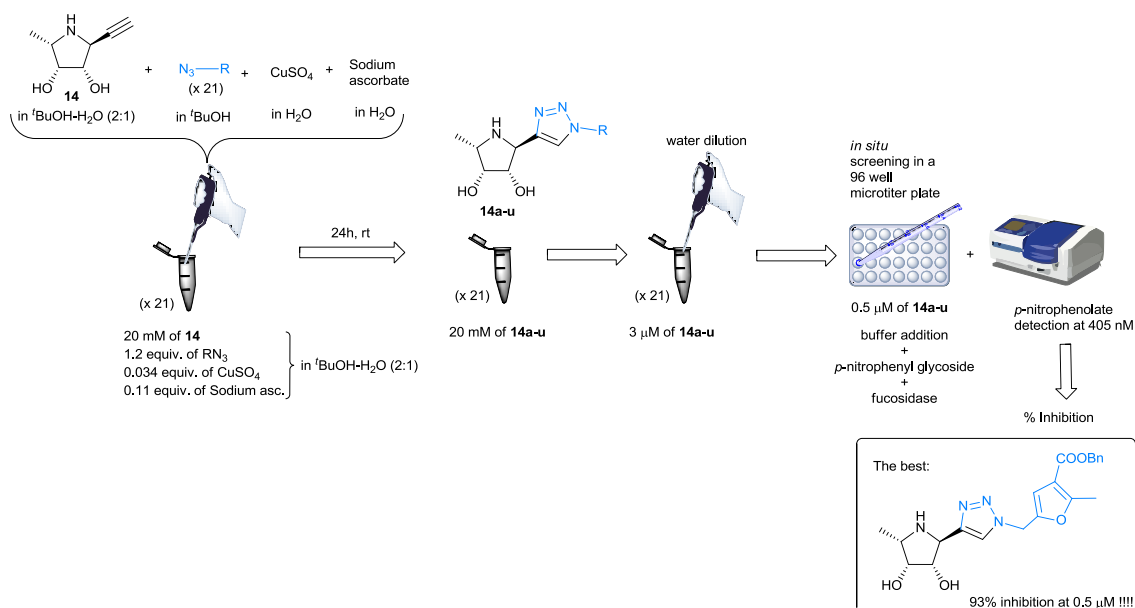

## 2. IC<sub>50</sub> and Lineweaver-Burk plots

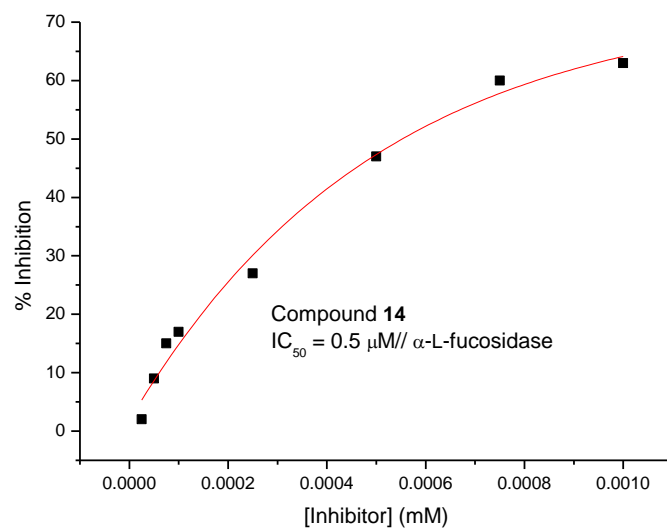

**Figure 1.** IC<sub>50</sub> of compound **14** towards α-L-fucosidase (bovine kidney)

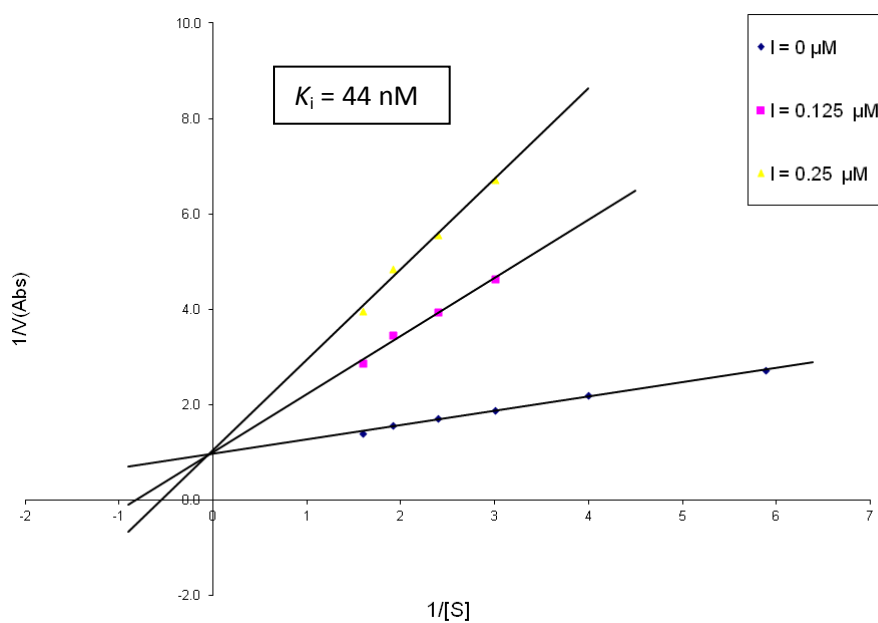

**Figure 2.**  $K_i$  of compound **14** towards α-L-fucosidase (bovine kidney)

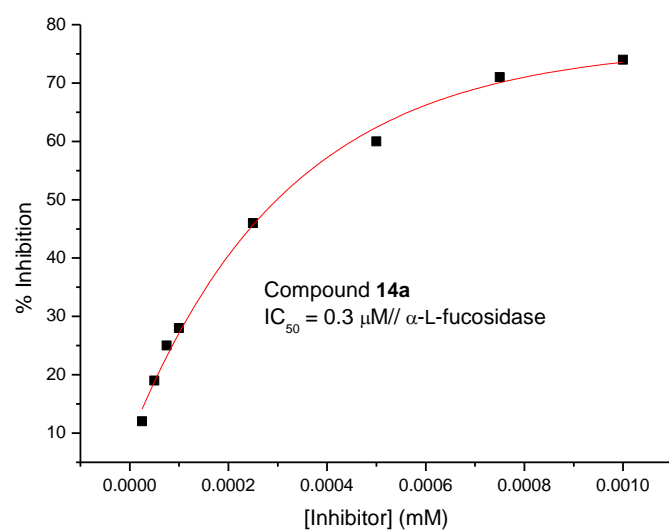

**Figure 3.**  $IC_{50}$  of compound **14a** towards  $\alpha$ -L-fucosidase (bovine kidney)

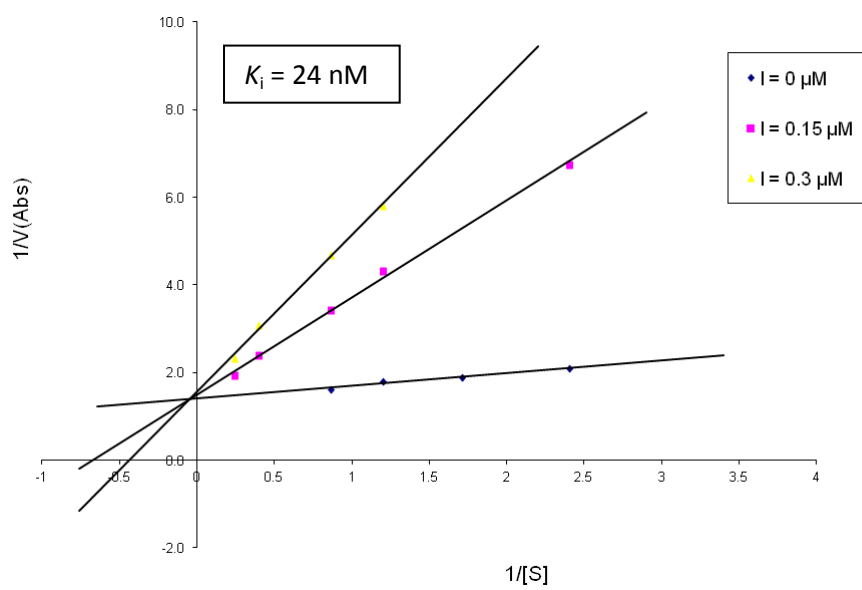

**Figure 4.**  $K_i$  of compound **14a** towards  $\alpha$ -L-fucosidase (bovine kidney)

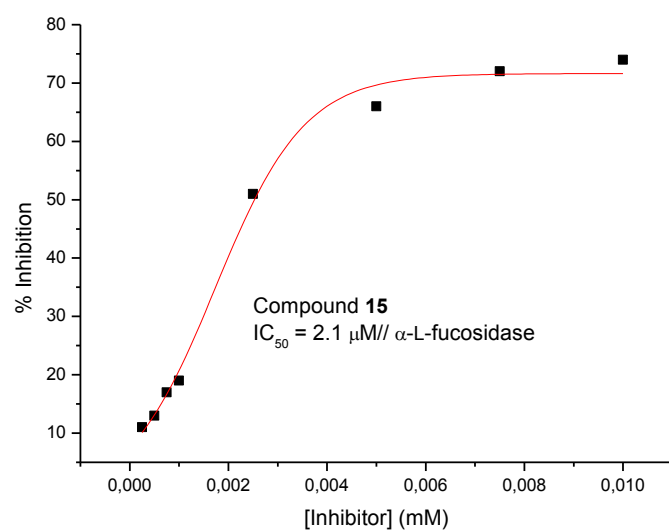

**Figure 5.**  $IC_{50}$  of compound **15** towards  $\alpha$ -L-fucosidase (bovine kidney)

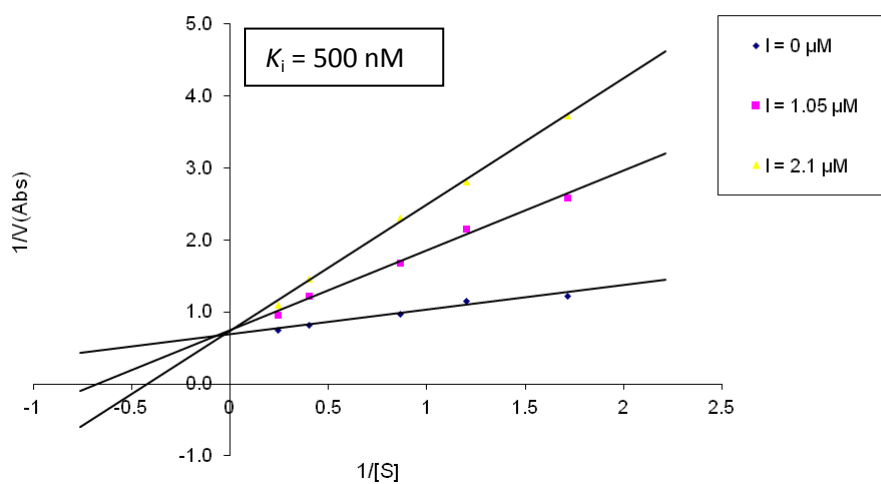

**Figure 6.**  $K_i$  of compound **15** towards  $\alpha$ -L-fucosidase (bovine kidney)

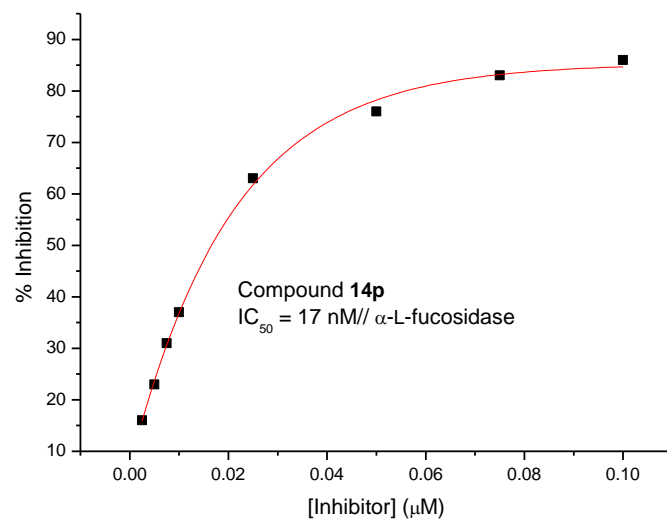

**Figure 7.**  $IC_{50}$  of compound **14p** towards  $\alpha$ -L-fucosidase (bovine kidney)

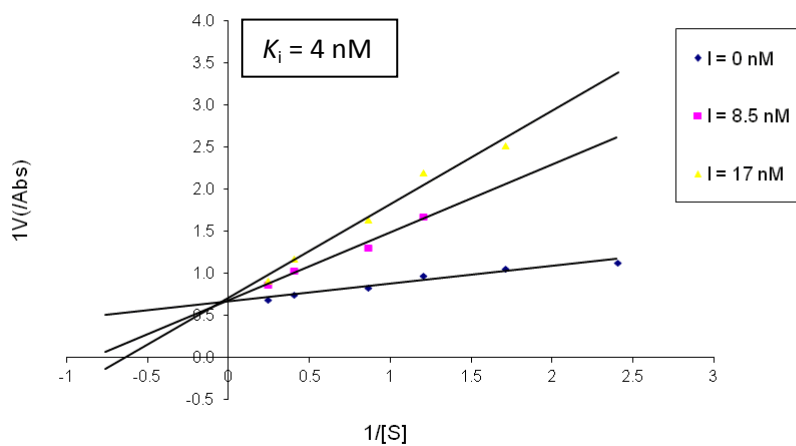

**Figure 8.**  $K_i$  of compound **14p** towards  $\alpha$ -L-fucosidase (bovine kidney)

### 3. Experimental details for the preparation of compound 6

#### Synthesis of pyrroline 6<sup>1,2</sup>

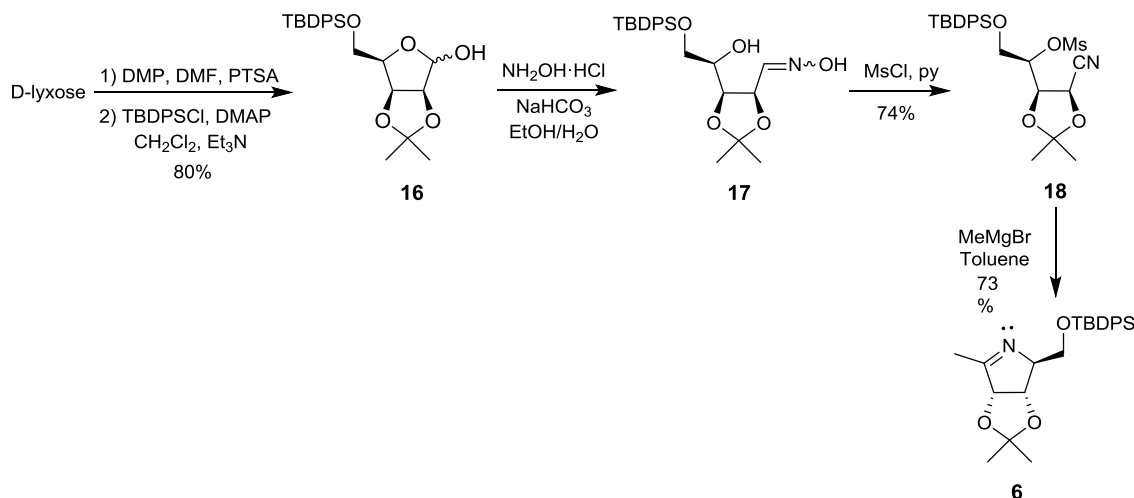

#### 5-*O*-*tert*-Butyldiphenylsilyl-2,3-*O*-isopropylidene-4-*O*-methanesulfonyl-D-lyxonitrile (18)

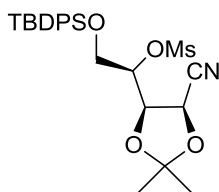

To a solution of hydroxylamine hydrochloride (7.5 g, 104.7 mmol) in EtOH:H<sub>2</sub>O (1:1, 160 mL), NaHCO<sub>3</sub> (8.8 g, 104.7 mmol) was slowly added. The solution was stirred at r.t. for 15 min. Then, a solution of compound **16**<sup>2</sup> (9.96 g, 23.2 mmol) in ethanol (80 mL) was added and the mixture stirred for 72 h at r.t. After concentration under reduced pressure, the residue was diluted with EtOAc and washed with H<sub>2</sub>O. The aqueous phase was extracted twice with EtOAc. Combined organic layers were washed with brine, dried over anhydrous Na<sub>2</sub>SO<sub>4</sub>, filtered and concentrated under reduced pressure to give the corresponding oximes **17** which were used in the next step without purification. Methanesulfonylchloride (15 mL, 193.8 mmol) was slowly added to a solution of both oximes in anhydrous pyridine (60 mL) at 0 °C. After 6 h at r.t., the mixture was cooled to 0 °C, H<sub>2</sub>O (20 mL) was added and the reaction stirred for 15 min at r.t. Then, the solvent was evaporated, the crude was diluted with EtOAc and washed twice with H<sub>2</sub>O. The organic phase was dried over Na<sub>2</sub>SO<sub>4</sub>, filtered and concentrated. The resulting residue was purified by chromatography column on silica gel (EtOAc/cyclohexane, 1:6) to give **18** (8.6 g, 17.1 mmol, 74%, two steps) as a yellow oil. [ $\alpha$ ]<sub>D</sub><sup>27</sup> + 1.8 (*c* 1.03, CH<sub>2</sub>Cl<sub>2</sub>). IR ( $\nu$  cm<sup>-1</sup>) 2933,

<sup>1</sup> The synthesis of pyrroline **6** was carried out from D-lyxose following the procedure reported by Behr but using the *tert*-butyldiphenylsilyl ether as protecting group: J.-B. Behr, A. Kalla, C. Harakat, R. Plantier-Royon, *J. Org. Chem.*, 2008, **73**, 3612.

<sup>2</sup> X. Cheng, N. Khan, D. R. Mootoo, *J. Org. Chem.*, 2000, **65**, 2544.

2855, 2387 (CN), 1362, 1177, 702.  $^1\text{H}$  NMR (300 MHz,  $\text{CDCl}_3$ ,  $\delta$  ppm,  $J$  Hz)  $\delta$  7.68-7.63 (m, 4H, H-aromat.), 7.48-7.39 (m, 6H, H-aromat.), 4.94 (ddd, 1H,  $J_{4,3} = 8.7$ ,  $J_{4,5b} = 5.0$ ,  $J_{4,5a} = 4.0$ , H-4), 4.73 (d, 1H,  $J_{2,3} = 5.1$ , H-2), 4.46 (dd, 1H, H-3), 4.01 (dd, 1H,  $^2J_{5a,5b} = 11.7$ , H-5a), 3.93 (dd, 1H, H-5b), 3.08 (s, 3H, Me of Ms), 1.60 (s, 3H,  $-\text{C}(\text{CH}_3)_2$ ), 1.42 (s, 3H,  $-\text{C}(\text{CH}_3)_2$ ), 1.09 (s, 9H,  $-\text{C}(\text{CH}_3)_3$ ).  $^{13}\text{C}$  NMR (75.4 MHz,  $\text{CDCl}_3$ ,  $\delta$  ppm)  $\delta$  135.7, 135.6, 132.1, 132.0, 130.4, 130.3, 128.3, 125.2 (C-aromat.), 116.3 (CN), 112.7 ( $-\text{C}(\text{CH}_3)_2$ ), 80.4 (C-4), 77.0 (C-3), 65.6 (C-2), 63.9 (C-5), 38.6 (Me of Ms), 27.1 ( $-\text{C}(\text{CH}_3)_2$ ), 27.0 ( $-\text{C}(\text{CH}_3)_3$ ), 26.1 ( $-\text{C}(\text{CH}_3)_2$ ), 19.3 ( $-\text{C}(\text{CH}_3)_3$ ). LSIMS  $m/z$  526 [60%,  $(\text{M}+\text{Na})^+$ ]. HRLSIMS  $m/z$  found 526.1711, calc. for  $\text{C}_{25}\text{H}_{33}\text{NO}_6\text{SSiNa}$ : 526.1696.

**(3*R*,4*S*,5*S*)-5-[(*O*-*tert*-Butyldiphenylsilyl)hydroxymethyl]-3,4-isopropylidene-2-methyl-1-pyrroline-3,4-diol (6)**

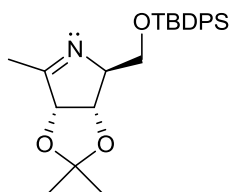

To a solution of **18** (8.6 g, 17.1 mmol) in anhydrous toluene (70 mL),  $\text{MeMgBr}$  (7.0 mL, 21.0 mmol) was added dropwise. The mixture was stirred at  $70\text{ }^\circ\text{C}$  for 7 h and then cooled to r.t. Diethyl ether (70 mL) and sat. aq. sol. of  $\text{NH}_4\text{Cl}$  (70 mL) were successively added and the resulting solution was extracted. The aqueous phase was extracted twice with  $\text{CH}_2\text{Cl}_2$  and the organic layers were washed with brine, dried over  $\text{Na}_2\text{SO}_4$ , filtered and evaporated. The resulting residue was purified by chromatography column on silica gel (Toluene/acetone, 30:1) to give **6** (5.3 g, 12.5 mmol, 73%) as a yellow oil.  $[\alpha]_D^{23}$   $-46.4$  ( $c$  1.03,  $\text{CH}_2\text{Cl}_2$ ). IR ( $\nu$   $\text{cm}^{-1}$ ) 2930, 2857, 1650, 1107, 1075, 687.  $^1\text{H}$  NMR (300 MHz,  $\text{CDCl}_3$ ,  $\delta$  ppm,  $J$  Hz)  $\delta$  7.64-7.58 (m, 4H, H-aromat.), 7.44-7.36 (m, 6H, H-aromat.), 4.97 (d, 1H,  $J_{4,3} = 5.1$ , H-4), 4.63 (d, 1H, H-3), 4.22-4.18 (m, 1H, H-5), 3.92 (dd, 1H,  $^2J_{1'a,1'b} = 10.2$ ,  $J_{1'a,5} = 2.7$ , H-1'a), 3.86 (dd, 1H,  $J_{1'b,5} = 3.0$ , H-1'b), 2.15 (s, 3H, Me), 1.37 (s, 6H,  $-\text{C}(\text{CH}_3)_2$ ), 1.01 (s, 9H,  $-\text{C}(\text{CH}_3)_3$ ).  $^{13}\text{C}$  NMR (75.4 MHz,  $\text{CDCl}_3$ ,  $\delta$  ppm)  $\delta$  174.9 (C-2), 135.8, 135.6, 133.4, 132.9, 130.0, 129.9, 127.92, 127.88 (C-aromat.), 111.6 ( $-\text{C}(\text{CH}_3)_2$ ), 87.8 (C-4), 81.1 (C-3), 77.0 (C-5), 63.9 (C-1'), 27.1 ( $-\text{C}(\text{CH}_3)_2$ ), 26.9 ( $-\text{C}(\text{CH}_3)_3$ ), 26.1 ( $-\text{C}(\text{CH}_3)_2$ ), 19.3 ( $-\text{C}(\text{CH}_3)_3$ ), 17.0 (Me). LSIMS  $m/z$  424 [34%,  $(\text{M}+\text{H})^+$ ], 346 [75%,  $(\text{M}-\text{C}_6\text{H}_5)^+$ ]. HRLSIMS  $m/z$  found 424.2309, calc. for  $\text{C}_{25}\text{H}_{34}\text{NO}_3\text{Si}$ : 424.2308.



#### 4. Experimental details for the synthesis of azides a-u

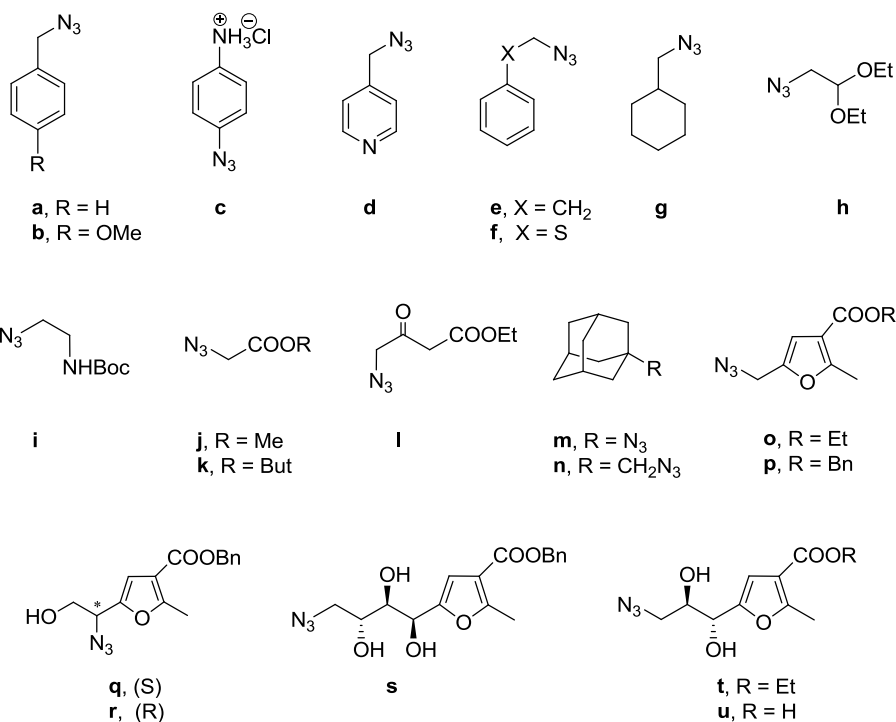

- Azides **c**, **f**, **j** and **m** were purchased from Sigma-Aldrich.
- Azides **a**, **b**, **e**, **g-i**, **k**, **l** and **n** were synthesized in one pot from commercially available halides following the standard protocols previously reported.<sup>3</sup> Nevertheless, they can be also obtained from commercial sources.
- Azides **q-u** have been previously prepared and characterized in our research group.<sup>4</sup>
- Azide **d**, although commercially available, was prepared following the same procedure than for azide **g**,<sup>3b</sup> and characterized here for the first time.
- Azides **o** and **p** have been prepared here for the first time.

<sup>3</sup> (a) For azide **a**, see: M. Lamani, P. Devadig, K. R. Prabhu, *Org. Biomol. Chem.*, 2012, **10**, 2753. (b) For azides **b**, **e** and **g**, see: T. Suzuki, Y. Ota, M. Ri, M. Bando, A. Gotoh, Y. Itoh, H. Tsumoto, P. R. Tatum, T. Mizukami, H. Nakagawa, S. Iida, R. Ueda, K. Shirahige, N. Miyata, *J. Med. Chem.*, 2012, **55**, 9562. (c) For azide **h**, see: E. Bellur, M. A. Yawer, I. Hussain, A. Riahi, O. Fatunsin, C. Fischer, P. Langer *Synthesis*, 2009, 227. (d) For azide **i**, see: J.-M. Kee, R. C. Oslund, D. H. Perlman, T. W. Muir *Nat. Chem. Biol.*, 2013, **9**, 416. (e) For azide **k**, see: N. J. Stanley, D. Pedersen, Sejer, Nielsen, B.; Kvist, T.; Mathiesen, J. M.; Braeuner-Osborne, H.; Taylor, D. K.; Abell, A. D. *Bioorg. Med. Chem. Lett.*, 2010, **20**, 7512. (f) For azide **l**, see: J. Chen, X.-G. Fu, L. Zhou, J.-T. Zhang, X.-L. Qi, X.-P. Cao *J. Org. Chem.*, 2009, **74**, 4149. (g) For azide **n**, see: L. Díaz, J. Casas, J. Bujons, A. Llebaria, A. Delgado, *J. Med. Chem.*, 2011, **54**, 2069.

<sup>4</sup> (a) For azides **q** and **r**, see: (i) L. Molina, A. J. Moreno-Vargas, A. T. Carmona, I. Robina *Synlett*, 2006, 1327. (ii) L. Molina, E. Moreno-Clavijo, A. J. Moreno-Vargas, A. T. Carmona, I. Robina *Eur. J. Org. Chem.*, 2010, 3110. (b) For azides **s**, **t** and **u**, see: J. Ramos-Soriano, U. Niss, J. Angulo, M. Angulo, A. J. Moreno-Vargas, A. T. Carmona, S. Ohlson, I. Robina, *Chem. Eur. J.*, 2013, **19**, 17989.

**4-(2-Azidoethyl)pyridine (d).** IR ( $\nu$   $\text{cm}^{-1}$ ) 2096 ( $\text{N}_3$ ), 1603, 1413, 1268, 794.  $^1\text{H}$  NMR (300 MHz,  $\text{CDCl}_3$ ,  $\delta$  ppm,  $J$  Hz)  $\delta$  8.63-8.61 (m, 2H, H-aromat.), 7.26-7.23 (m, 2H, H-aromat.), 4.41 (s, 2H,  $-\text{CH}_2\text{N}_3$ ).  $^{13}\text{C}$  NMR (75.4 MHz,  $\text{CDCl}_3$ ,  $\delta$  ppm)  $\delta$  150.4, 144.5, 122.5 (C-aromat.), 53.4 ( $-\text{CH}_2\text{N}_3$ ). HRCIMS  $m/z$  found 134.0592, calc. for  $\text{C}_6\text{H}_6\text{N}_4$ : 134.0592.

### General procedure for the synthesis of azides o and p

#### Ethyl 5-(azidomethyl)-2-methylfuran-3-carboxylate (o)

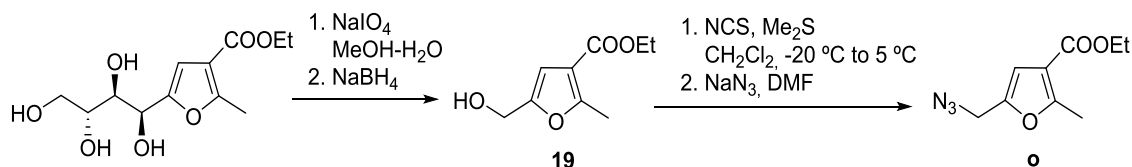

To a stirred solution of 3-ethoxycarbonyl-2-methyl-5-(*D*-arabinotetritol-1-yl)furan<sup>5</sup> (2.91 g, 10.61 mmol) in MeOH (40 mL) cooled to 0 °C was added a solution of  $\text{NaIO}_4$  (5.22 g, 24.40 mmol) in  $\text{H}_2\text{O}$  (30 mL), and the mixture was stirred for 1 h. Then, the solution was filtered, and  $\text{NaBH}_4$  (804 mg, 21.22 mmol) was added to the filtrate. After 30 min, the solution was neutralized with citric acid (pH 7) and concentrated. The crude was dissolved in  $\text{CH}_2\text{Cl}_2$  and washed with water. The organic layer was dried ( $\text{Na}_2\text{SO}_4$ ), filtered, and concentrated to give crude alcohol **19**. To a stirred solution of *N*-chlorosuccinimide (345 mg, 2.53 mmol) in anhydrous  $\text{CH}_2\text{Cl}_2$  (8 mL) cooled to 0 °C,  $\text{Me}_2\text{S}$  (200  $\mu\text{L}$ , 2.74 mmol) was added under  $\text{N}_2$ . After 5 min, a sol. of alcohol **19** (358 mg, 1.94 mmol) in anhydrous  $\text{CH}_2\text{Cl}_2$  (8 mL) at -20 °C was added under  $\text{N}_2$ . The mixture was allowed to warm to 5 °C. After 1 h, the solvent was evaporated. The crude product chloromethyl derivative was dissolved in DMF, and  $\text{NaN}_3$  (253 mg, 3.89 mmol) was added. The reaction mixture was stirred for 10 min. at r.t., then the solvent was evaporated, the resulting residue was dissolved in  $\text{CH}_2\text{Cl}_2$  and washed with water. The organic layer was dried ( $\text{Na}_2\text{SO}_4$ ), filtered and concentrated in vacuo. The residue was purified by column chromatography (EtOAc/cyclohexane, 1:8) to give pure azide **o** (342 mg, 1.63 mmol, 84%) as a colourless oil.

IR ( $\nu$   $\text{cm}^{-1}$ ) 2981, 2932, 2094 ( $\text{N}_3$ ), 1711 (C=O), 1222, 1079, 776.  $^1\text{H}$  NMR (300 MHz,  $\text{CDCl}_3$ ,  $\delta$  ppm,  $J$  Hz)  $\delta$  6.60 (s, 1H, H-4), 4.28 (q, 2H,  $^3J_{\text{H,H}} = 7.2$ ,  $-\text{CH}_2\text{CH}_3$ ), 4.23 (s, 2H,  $-\text{CH}_2\text{N}_3$ ), 2.58 (s, 3H, Me), 1.34 (t, 3H,  $-\text{CH}_2\text{CH}_3$ ).  $^{13}\text{C}$  NMR (75.4 MHz,  $\text{CDCl}_3$ ,  $\delta$  ppm)  $\delta$  163.8 (C=O), 160.1, 146.9, 114.5 (C-aromat.), 110.5 (C-4), 60.4 ( $-\text{CH}_2\text{CH}_3$ ), 46.9 ( $-\text{CH}_2\text{N}_3$ ), 14.5 ( $-\text{CH}_2\text{CH}_3$ ), 14.0 (Me). HRCIMS  $m/z$  found 210.0874, calc. for  $\text{C}_9\text{H}_{12}\text{O}_3\text{N}_3$ : 210.0879.

<sup>5</sup> (a) F. García-González *Adv. Carbohydr. Chem.*, 1956, **11**, 97. (b) G. Bartoli, J. G. Fernández-Bolaños, G. Di Antonio, G. Foglia, S. Giuli, R. Gunnella, M. Mancinelli, E. Marcantoni, M. Paoletti *J. Org. Chem.*, 2007, **72**, 6029.

### **Benzyl 5-(azidomethyl)-2-methylfuran-3-carboxylate (p)**

Azide **p** was synthesized as described for azide **o**, except that pure 3-benzyloxycarbonyl-2-methyl-5-(*D*-arabinotetritol-1-yl)furan<sup>6</sup> was used as starting material. Azide **p** was obtained in 90% as a yellow oil.

IR ( $\nu$   $\text{cm}^{-1}$ ) 2952, 2095 ( $\text{N}_3$ ), 1713 (C=O), 1214, 1072, 697.  $^1\text{H}$  NMR (300 MHz,  $\text{CDCl}_3$ ,  $\delta$  ppm, *J* Hz)  $\delta$  7.39-6.63 (m, 5H, H-aromat.), 6.63 (s, 1H, H-4), 5.28 (s, 2H,  $-\text{CH}_2\text{Ph}$ ), 4.23 (s, 2H,  $-\text{CH}_2\text{N}_3$ ), 2.59 (s, 3H, Me).  $^{13}\text{C}$  NMR (75.4 MHz,  $\text{CDCl}_3$ ,  $\delta$  ppm)  $\delta$  163.6 (C=O), 160.5, 147.1, 136.2, 128.7, 128.4, 128.3, 114.3 (C-aromat.), 110.5 (C-4), 66.2 ( $-\text{CH}_2\text{Ph}$ ), 46.9 ( $-\text{CH}_2\text{N}_3$ ), 14.1 (Me). HRCIMS *m/z* found 271.0947, calc. for  $\text{C}_{14}\text{H}_{13}\text{O}_3\text{N}_3$ : 271.0957.

---

<sup>6</sup> G. Coste, T. Horlacher, L. Molina, A. J. Moreno-Vargas, A. T. Carmona, I. Robina, P. H. Seeberger, S. Gerber-Lemaire, *Synthesis*, 2011, **11**, 1759.

## 5. Copies of $^1\text{H}$ and $^{13}\text{C}$ NMR Spectra

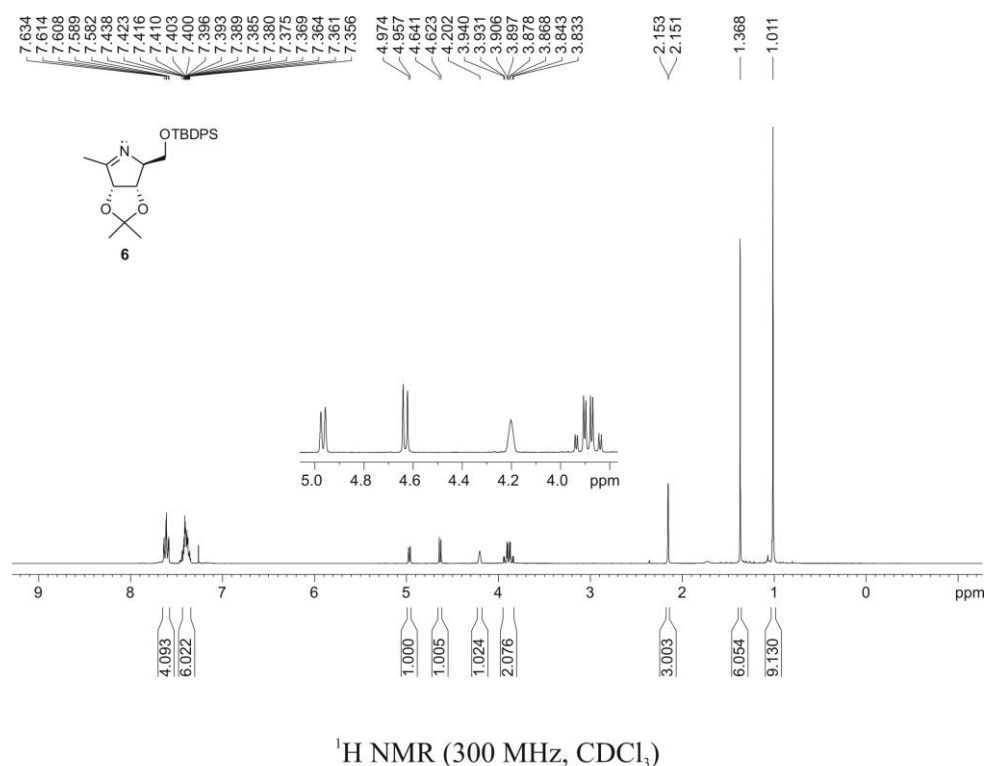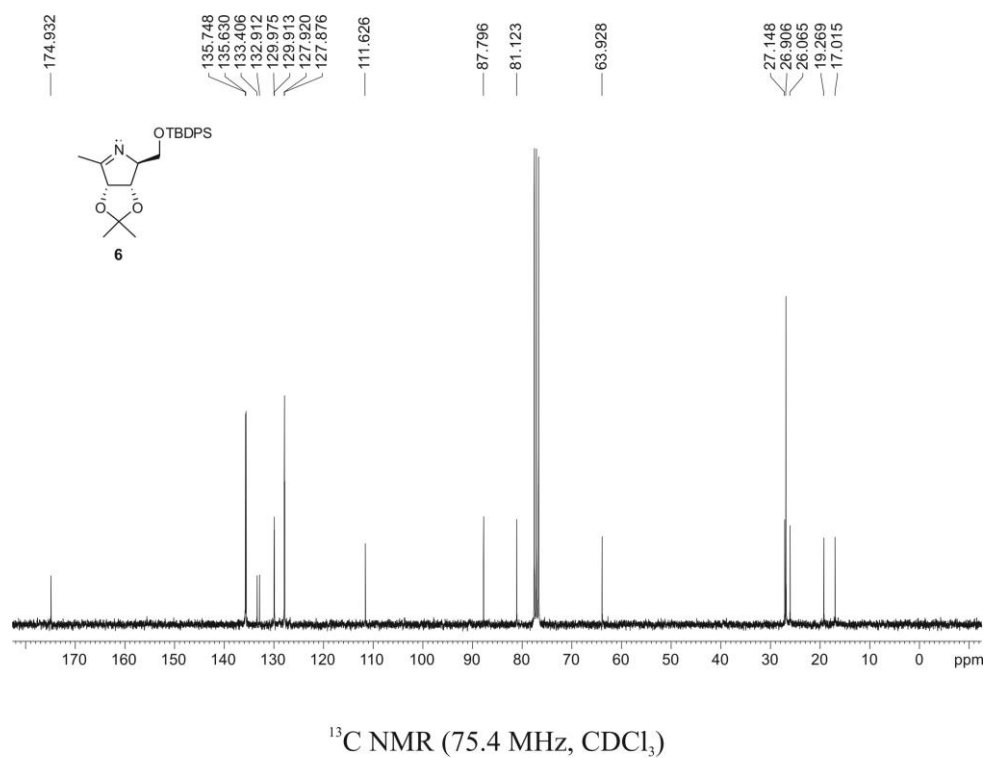

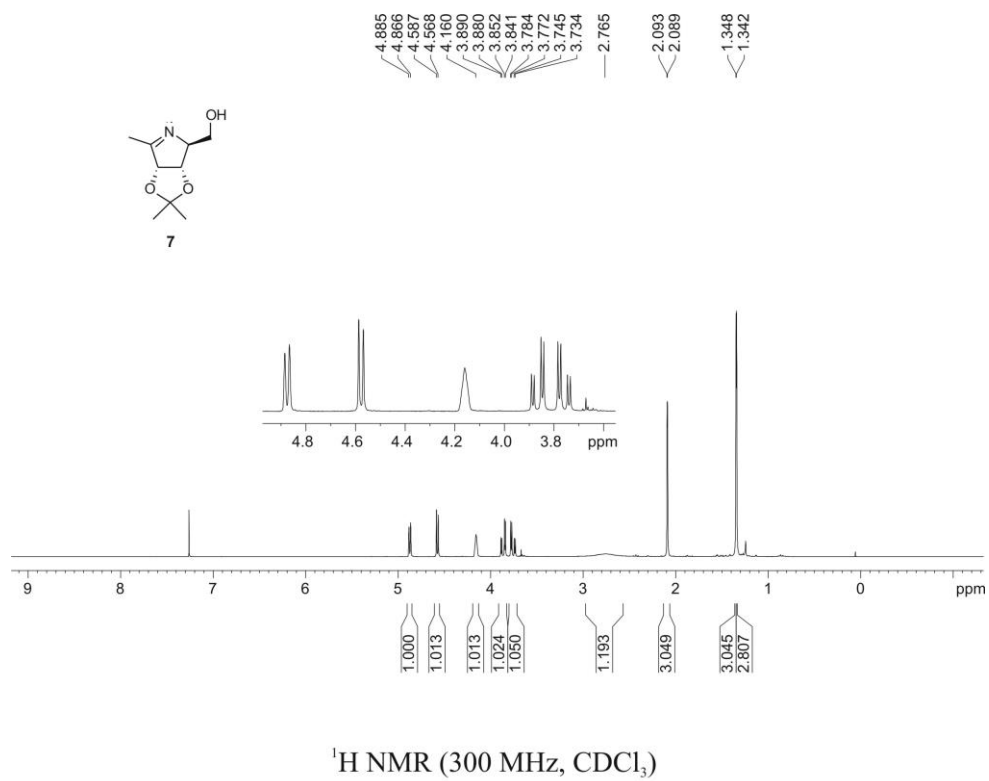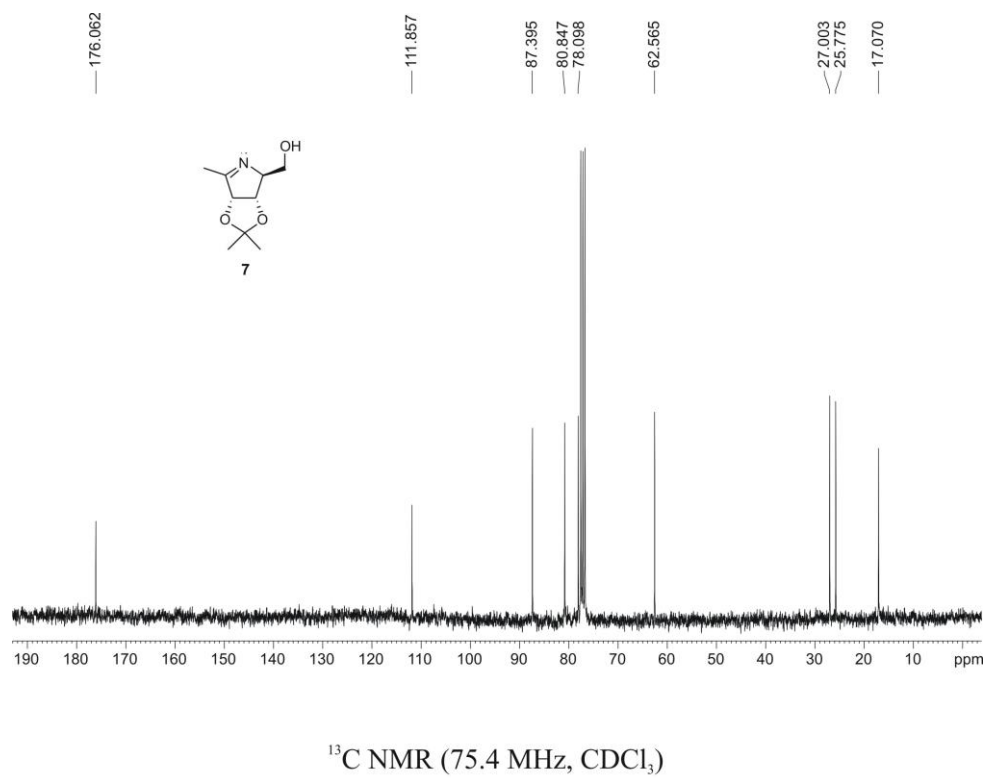

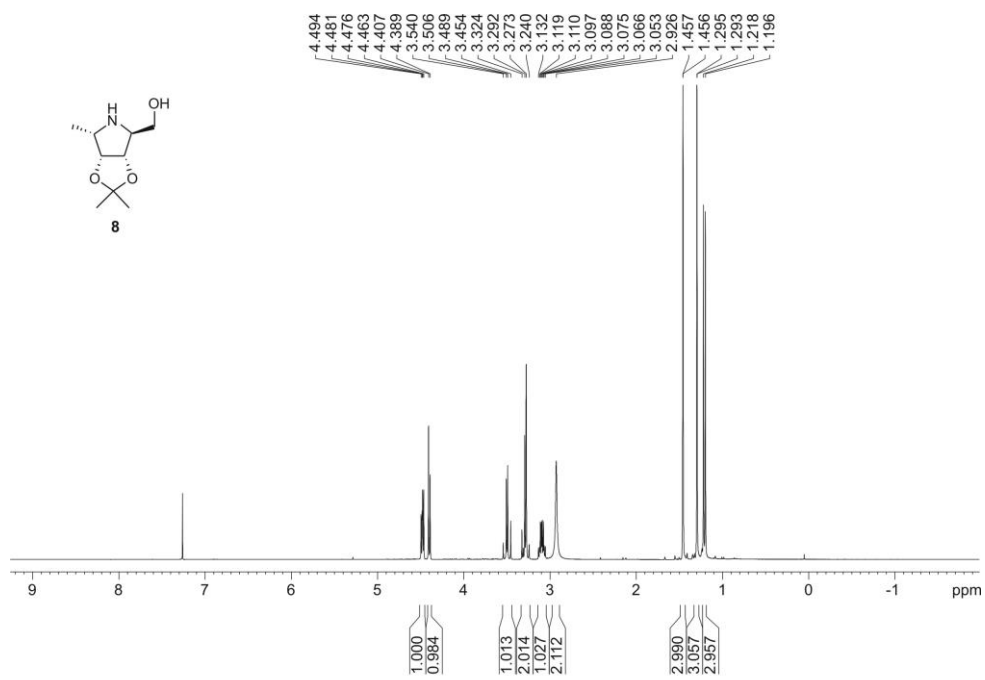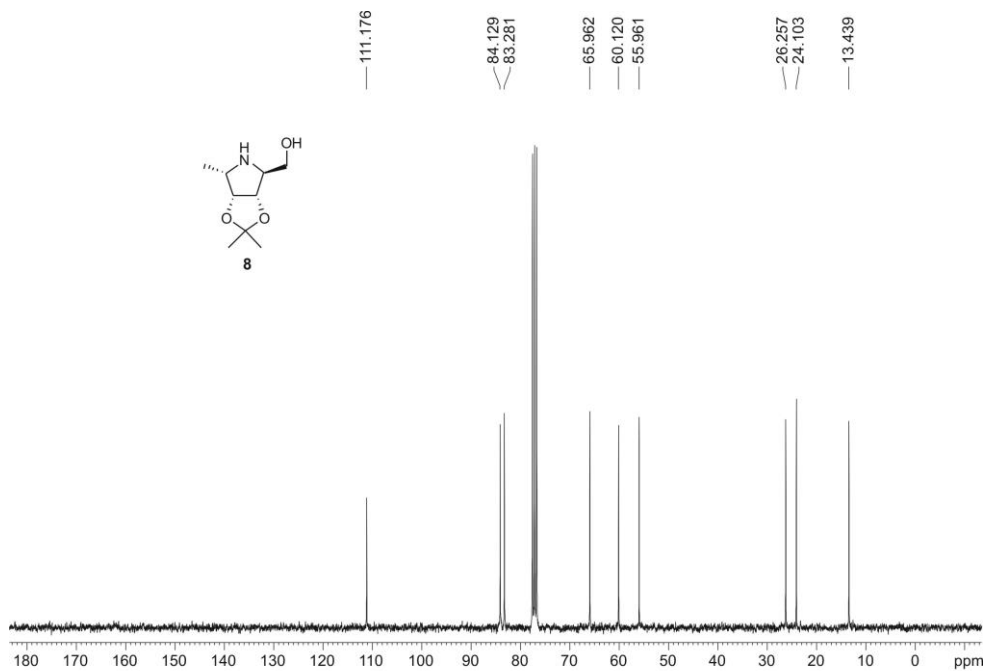

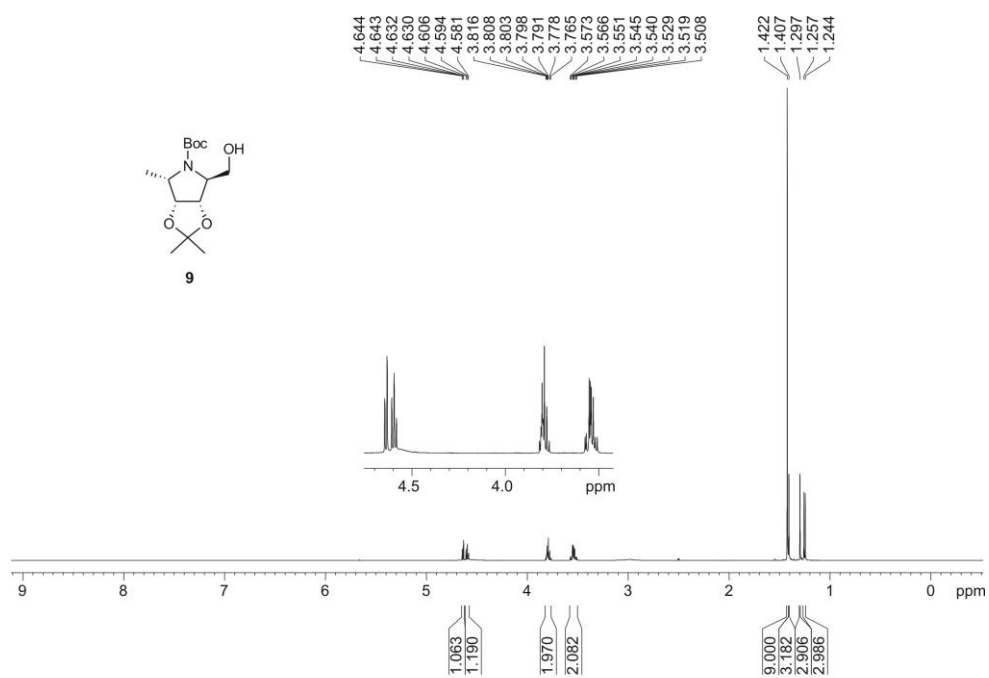

$^1\text{H NMR}$  (500 MHz,  $\text{DMSO-d}_6$ , 363K)

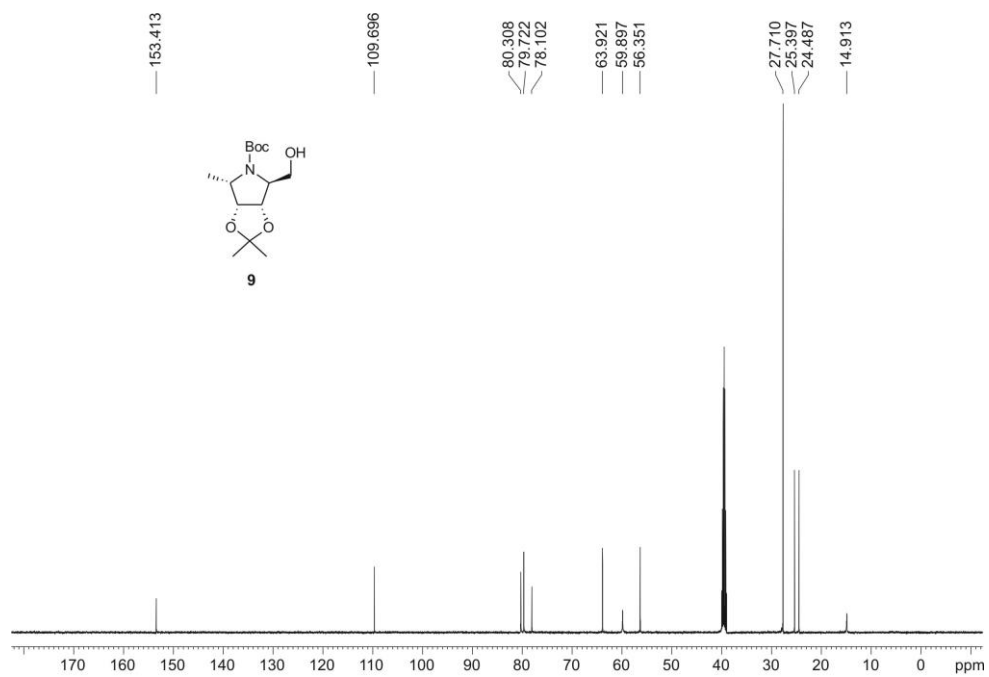

$^{13}\text{C NMR}$  (125.7 MHz,  $\text{DMSO-d}_6$ , 363K)

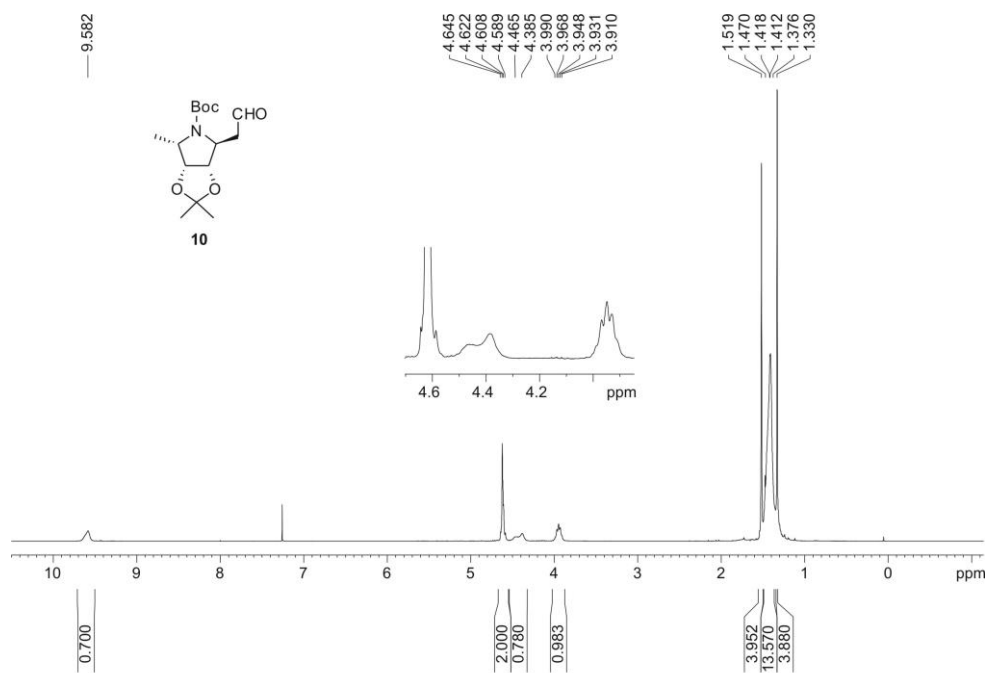

$^1\text{H NMR}$  (300 MHz,  $\text{CDCl}_3$ )

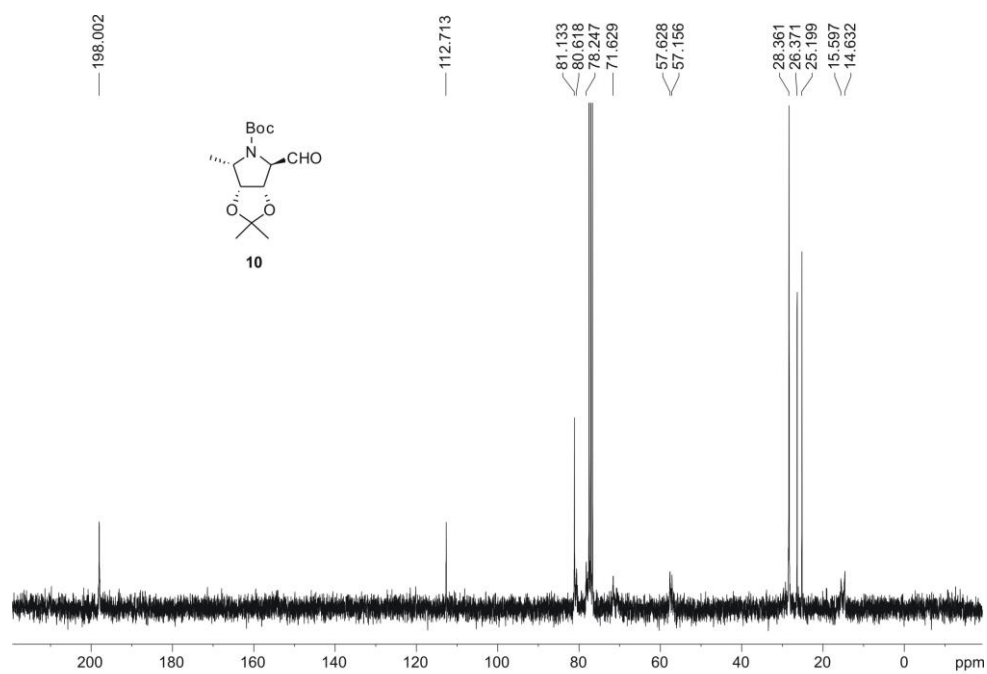

$^{13}\text{C NMR}$  (75.4 MHz,  $\text{CDCl}_3$ )



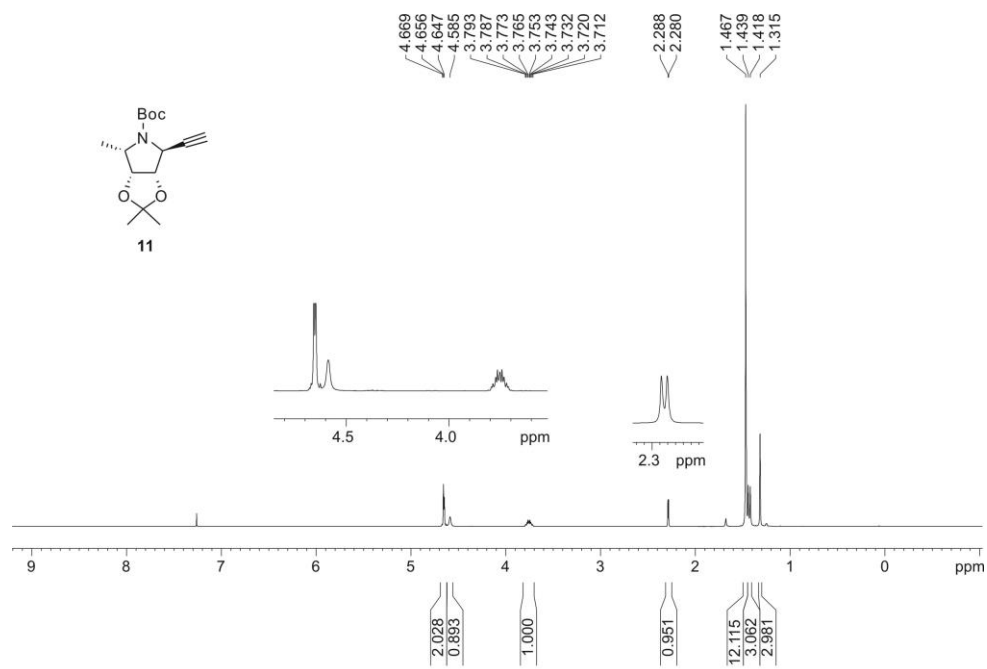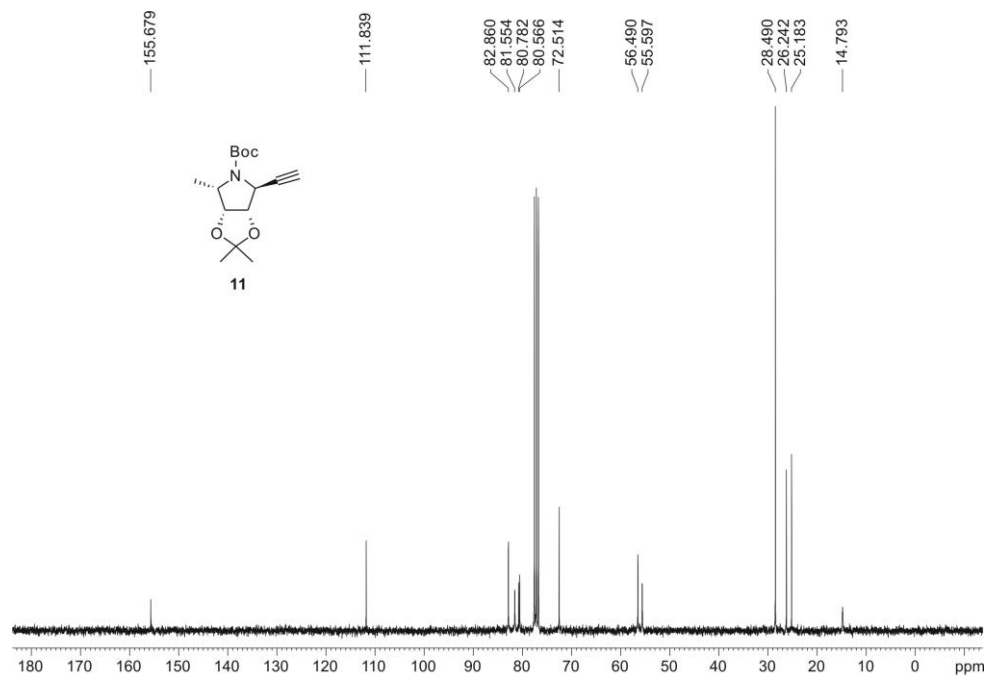

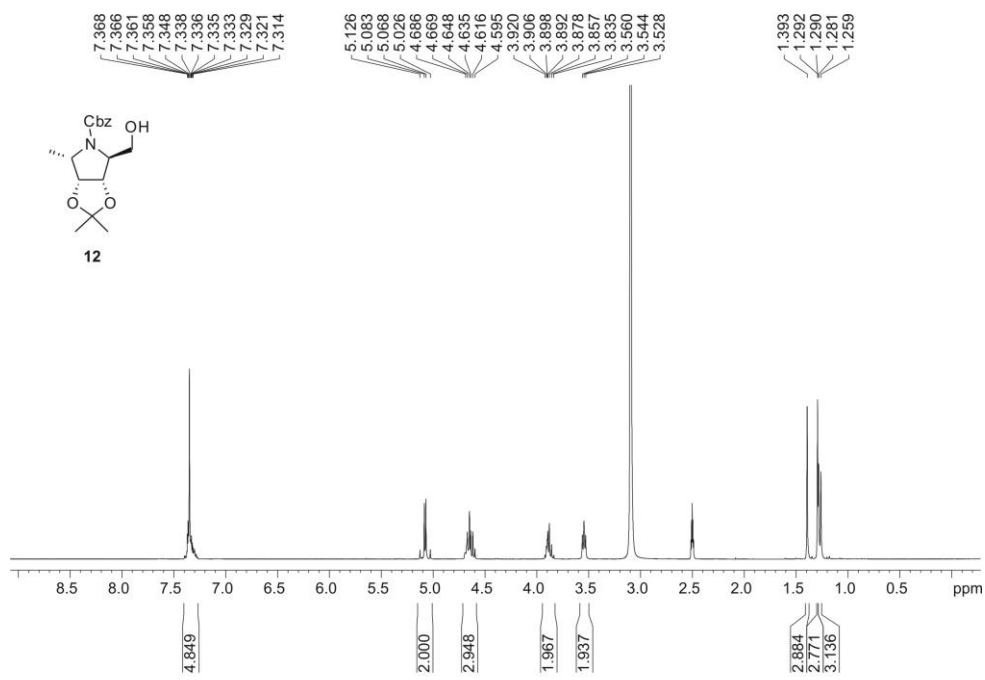

<sup>1</sup>H NMR (300 MHz, DMSO-d<sub>6</sub>, 363K)

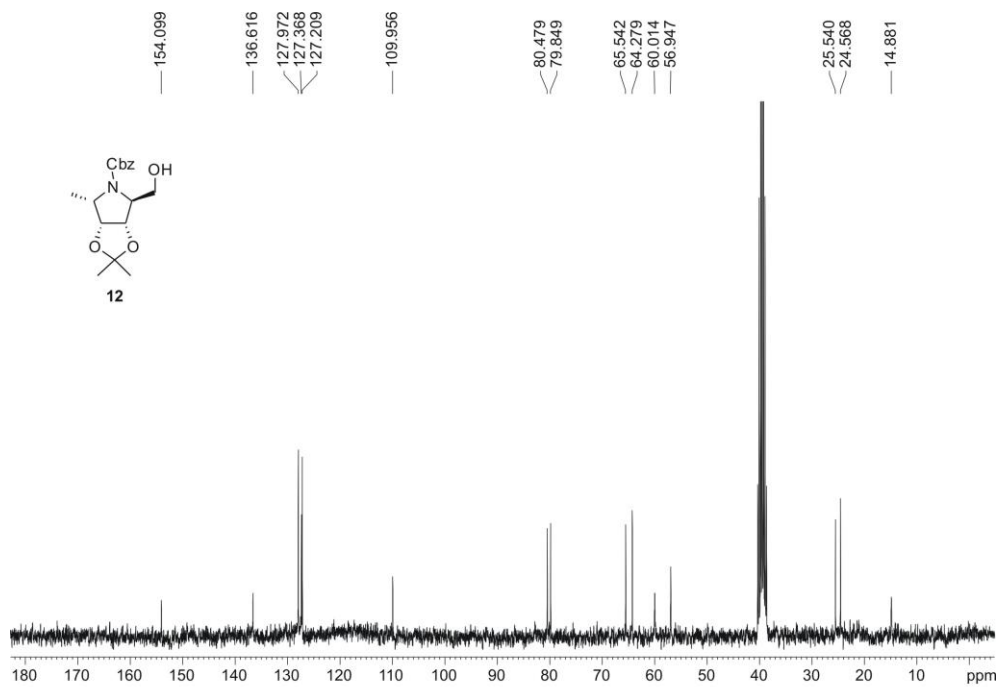

<sup>13</sup>C NMR (75.4 MHz, DMSO-d<sub>6</sub>, 363K)

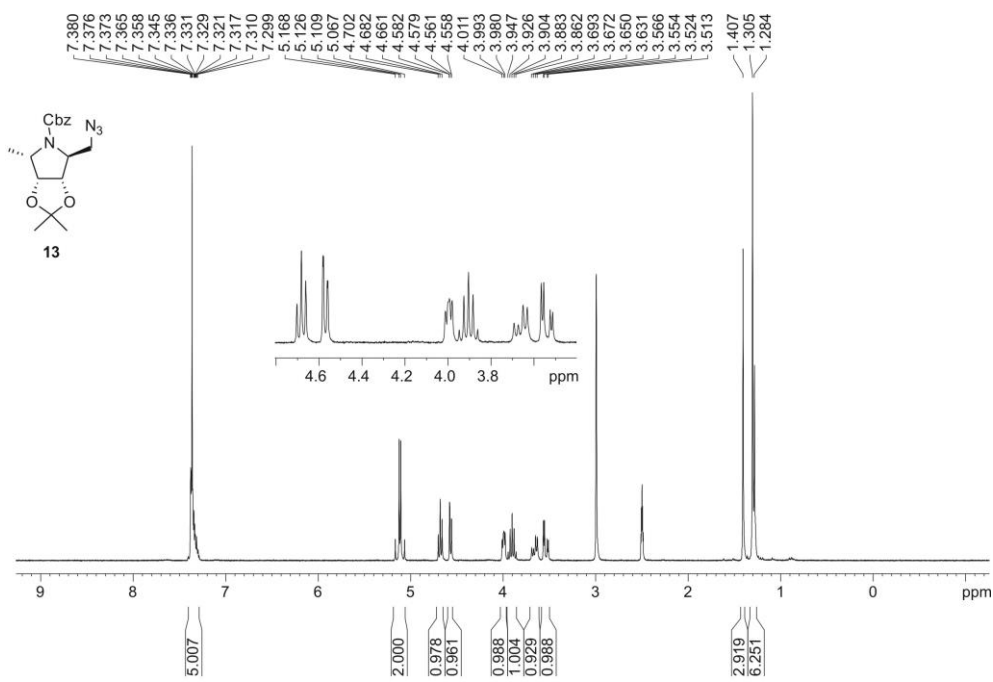

<sup>1</sup>H NMR (300 MHz, DMSO-d<sub>6</sub>, 363K)

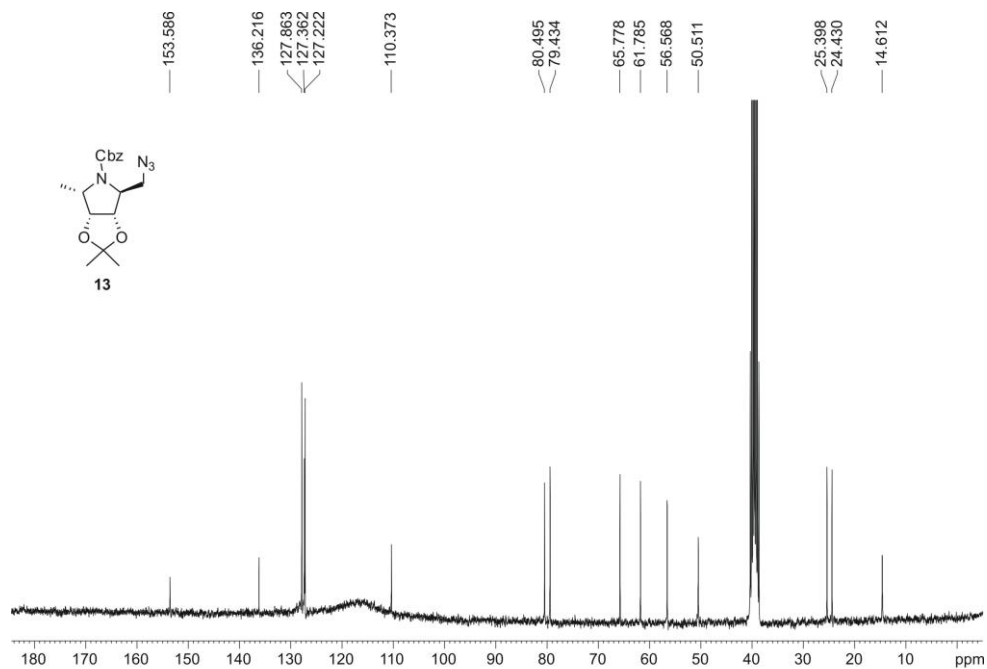

<sup>13</sup>C NMR (75.4 MHz, DMSO-d<sub>6</sub>, 363K)

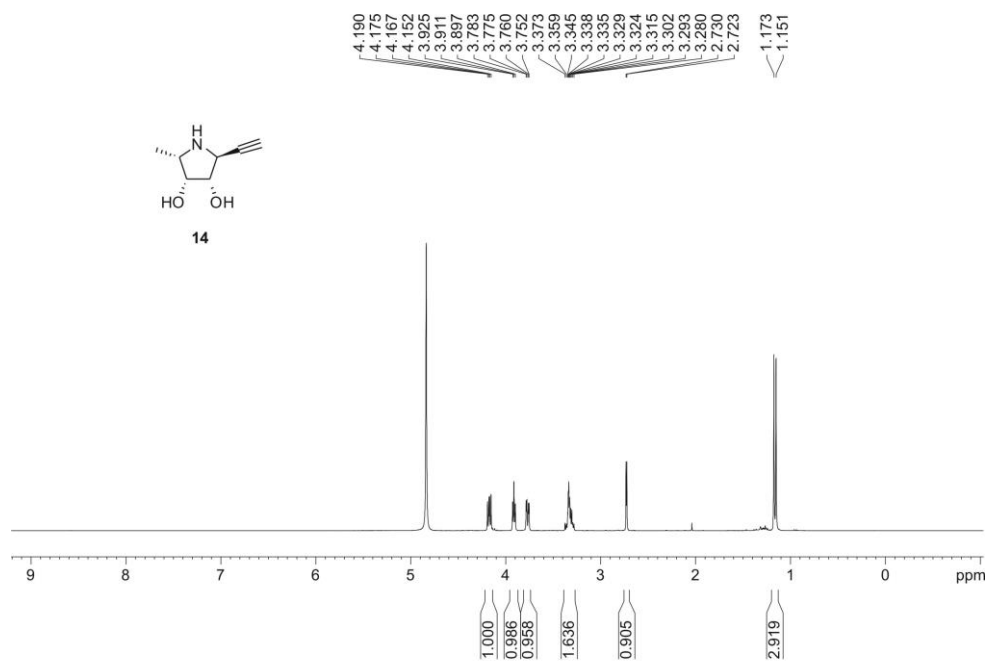

$^1\text{H}$  NMR (300 MHz, MeOD)

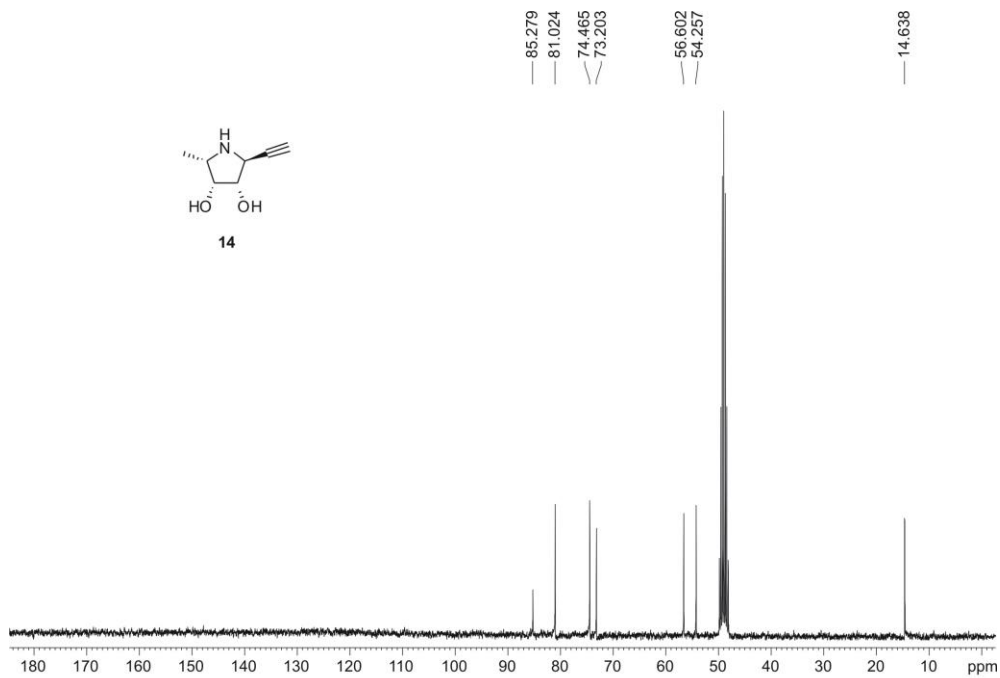

$^{13}\text{C}$  NMR (75.4 MHz, MeOD)

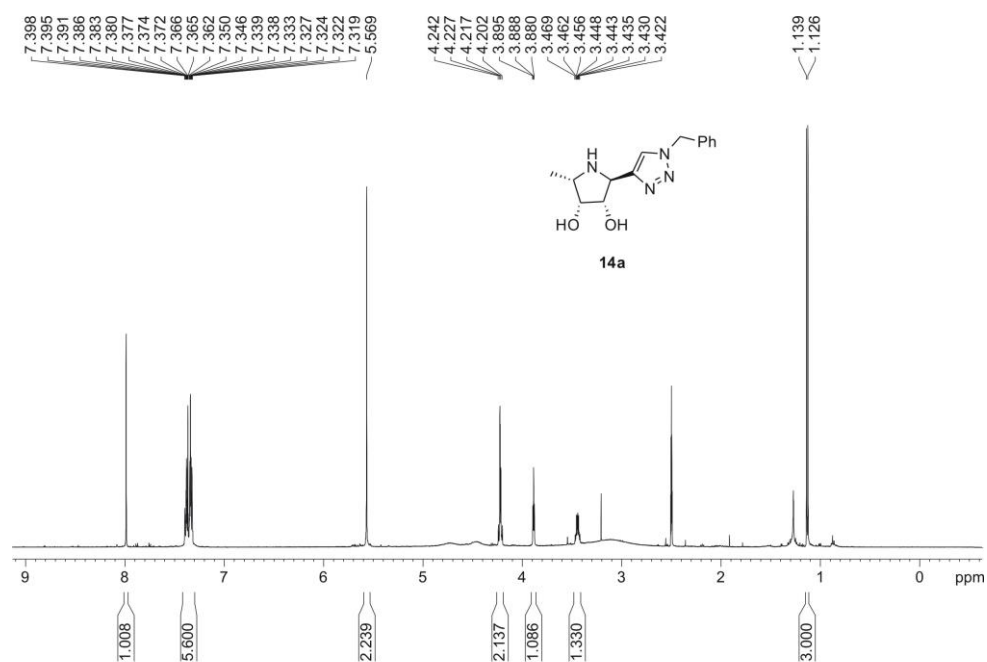

<sup>1</sup>H NMR (500 MHz, DMSO-d<sub>6</sub>, 363K)

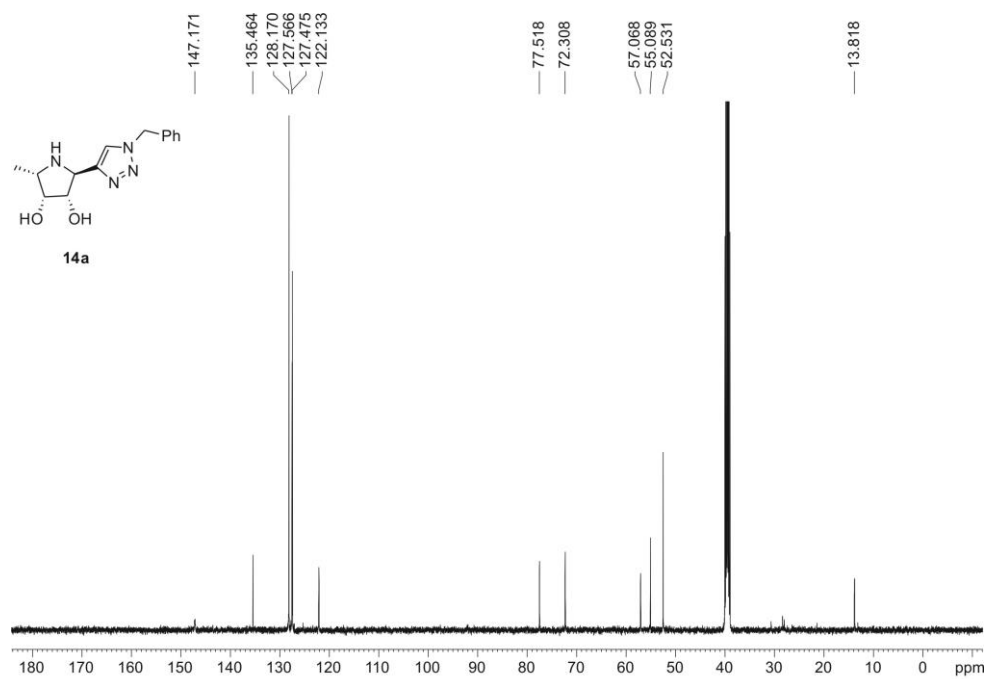

<sup>13</sup>C NMR (125.7 MHz, DMSO-d<sub>6</sub>, 363K)

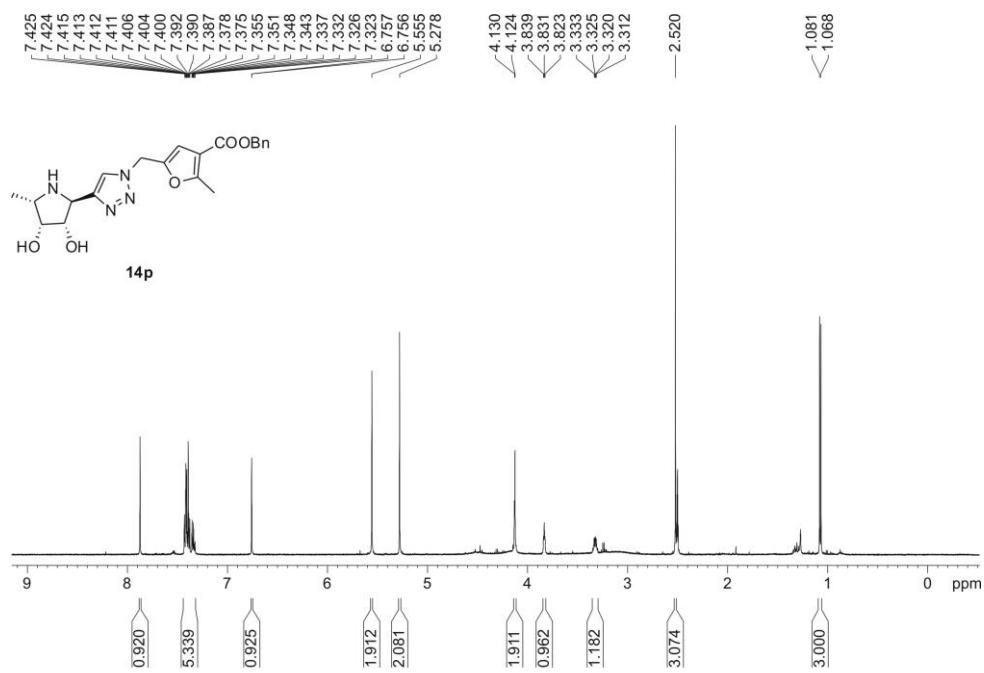

<sup>1</sup>H NMR (500 MHz, DMSO-d<sub>6</sub>, 363K)

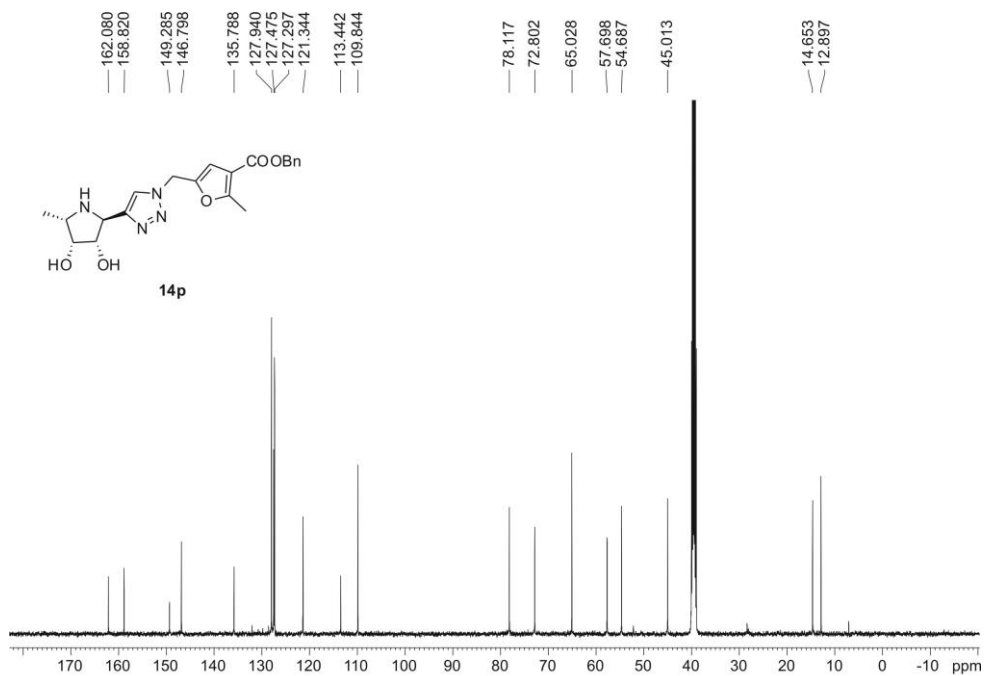

<sup>13</sup>C NMR (125.7 MHz, DMSO-d<sub>6</sub>, 363K)

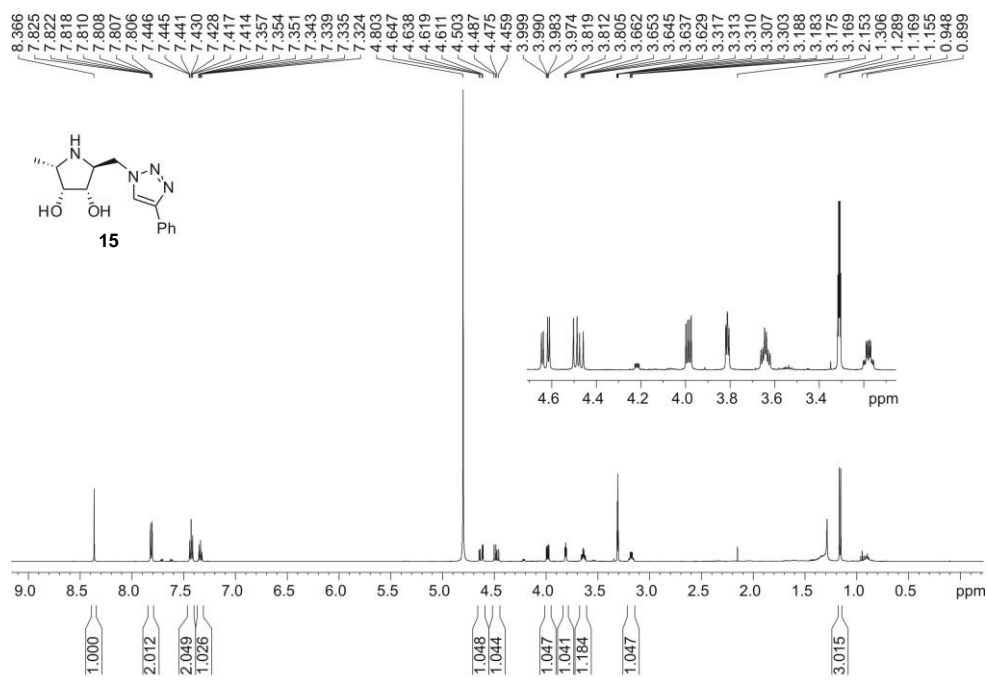

<sup>1</sup>H NMR (500 MHz, MeOD)

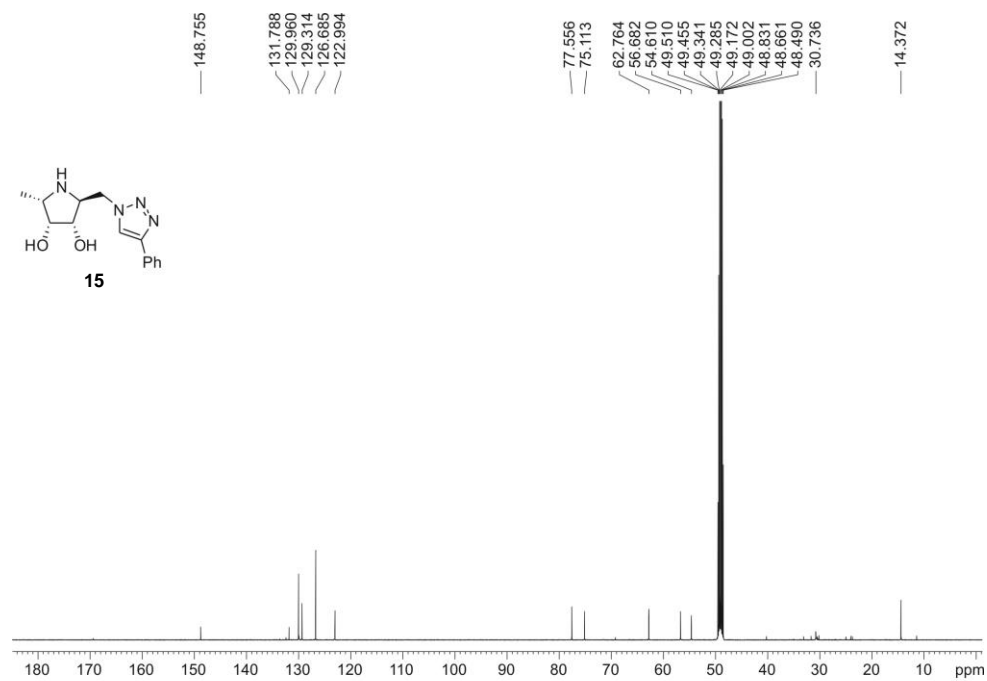

<sup>13</sup>C NMR (125.7 MHz, MeOD)

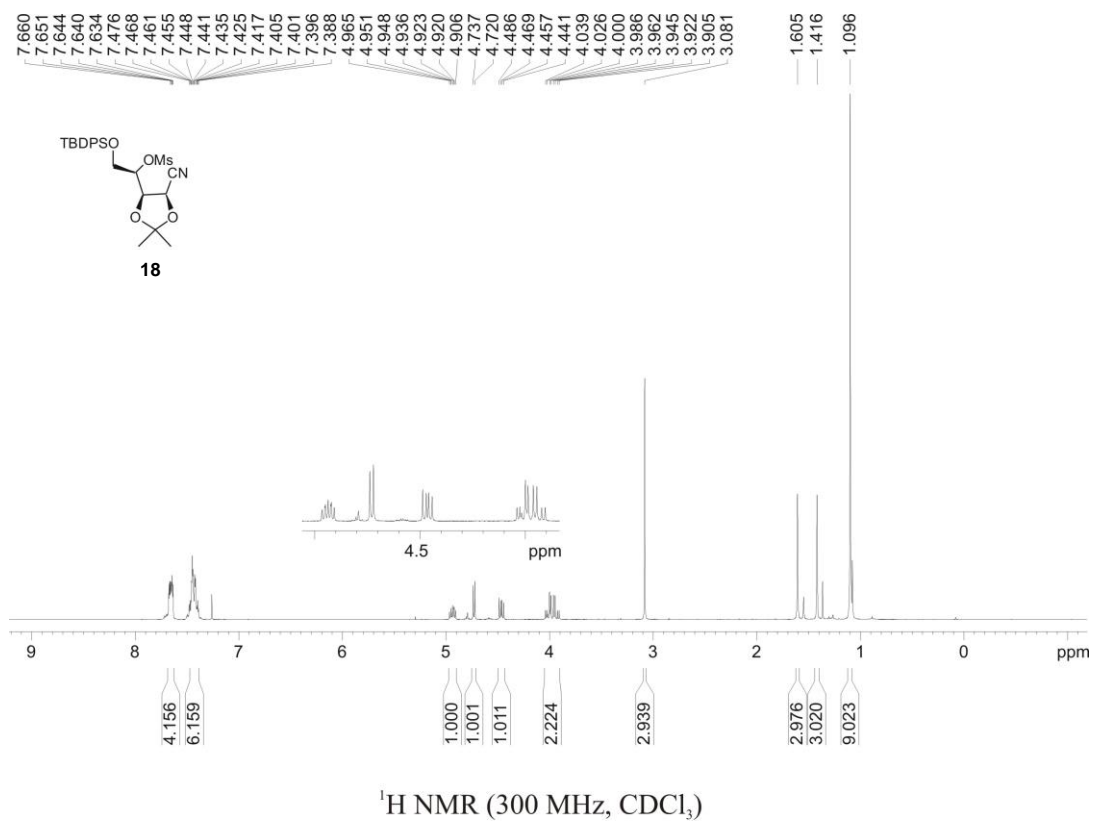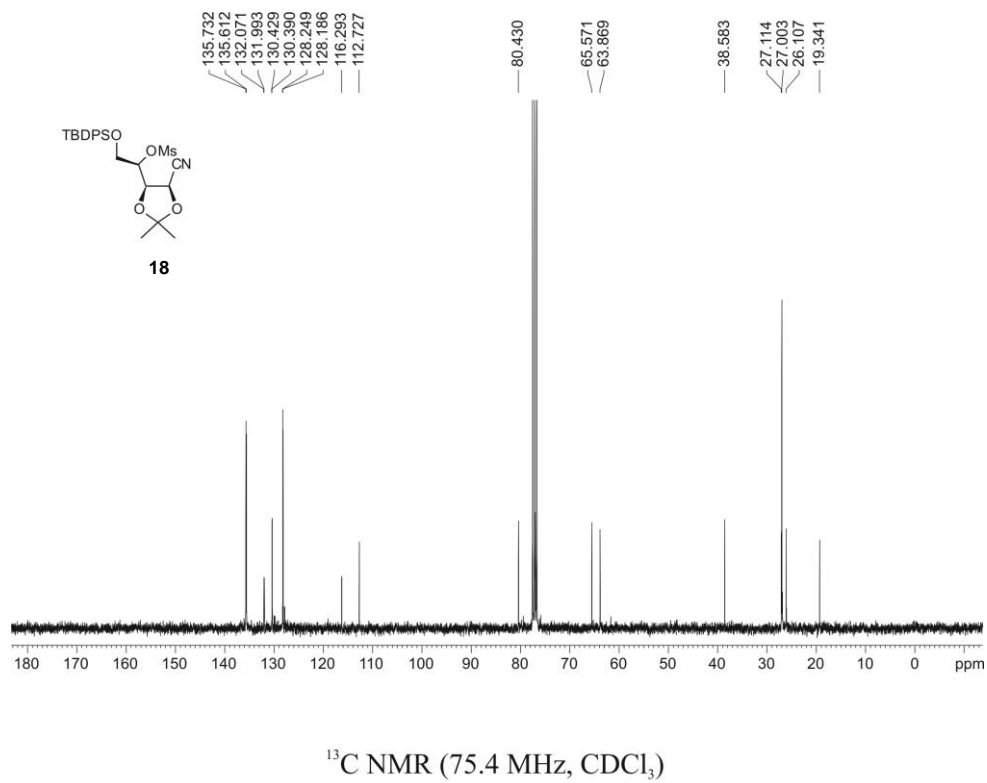



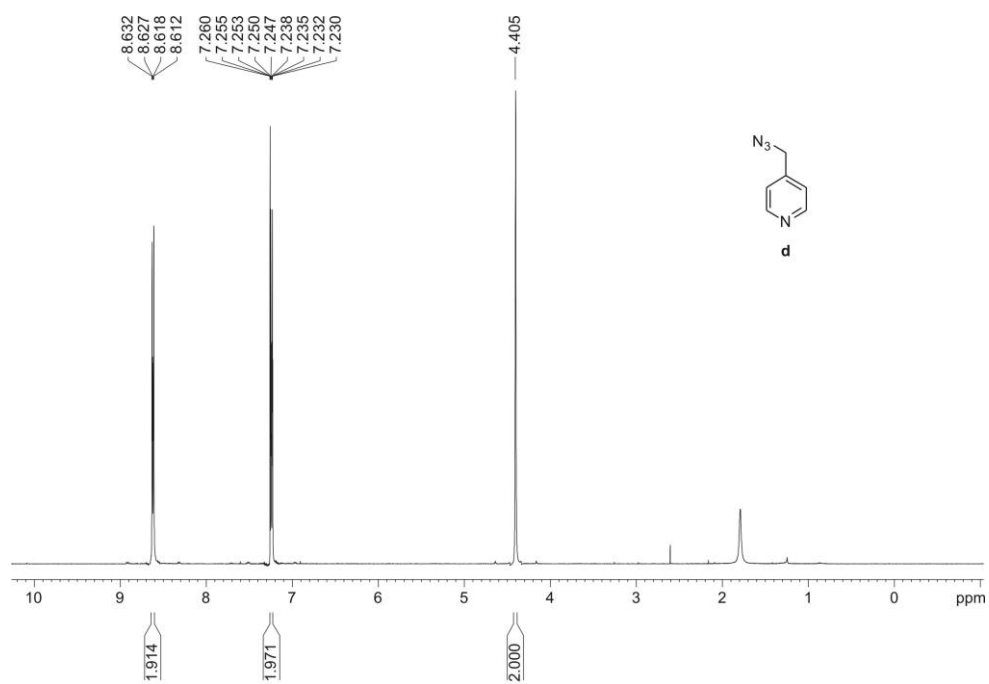

$^1\text{H}$  NMR (300 MHz,  $\text{CDCl}_3$ )

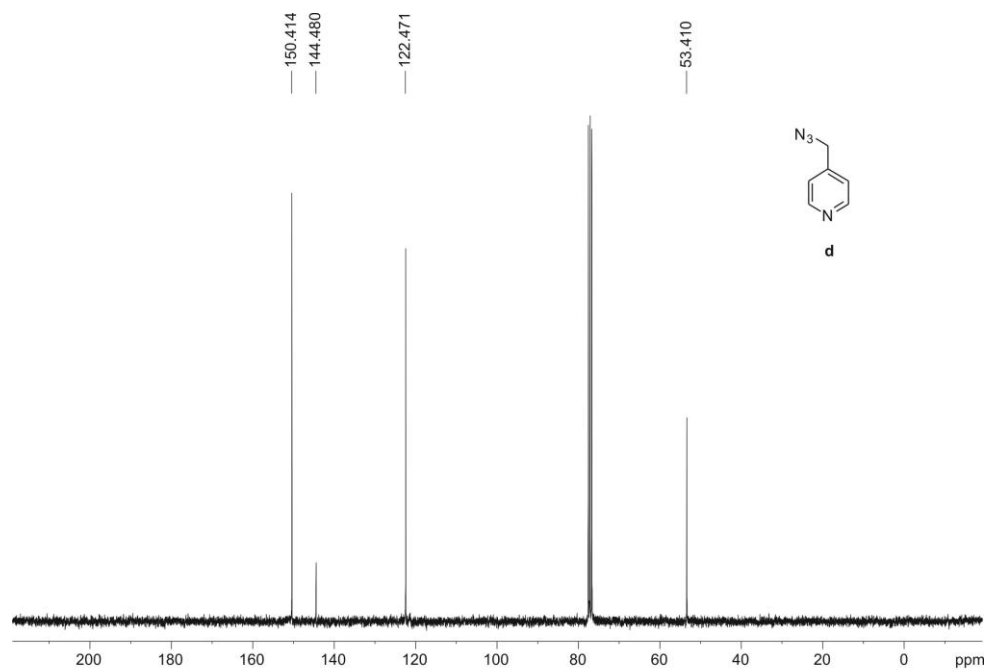

$^{13}\text{C}$  NMR (75.4 MHz,  $\text{CDCl}_3$ )

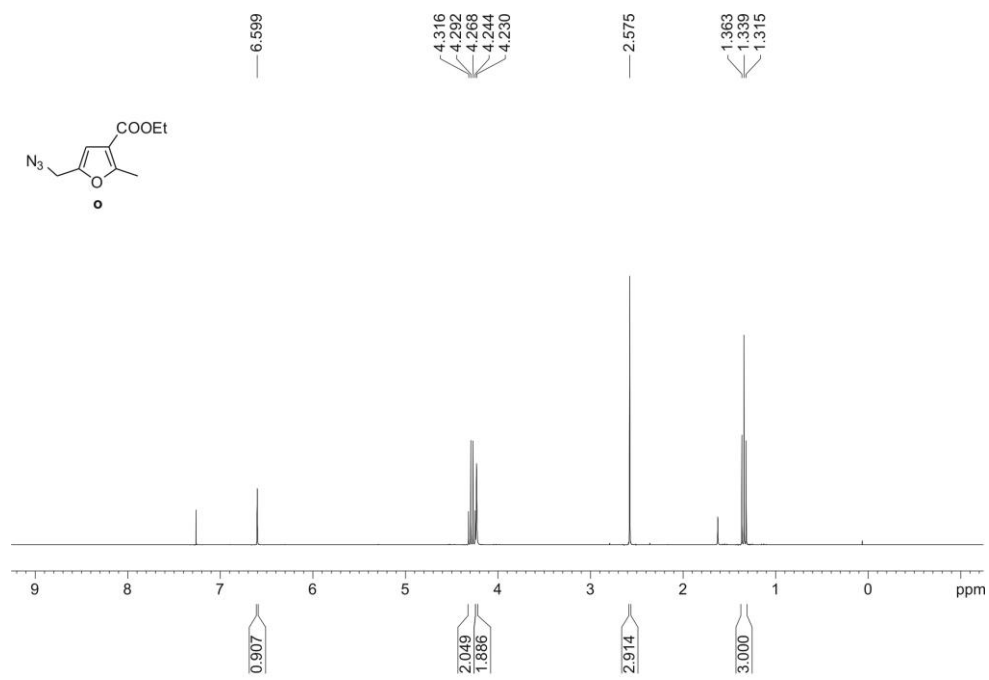

$^1\text{H}$  NMR (300 MHz,  $\text{CDCl}_3$ )

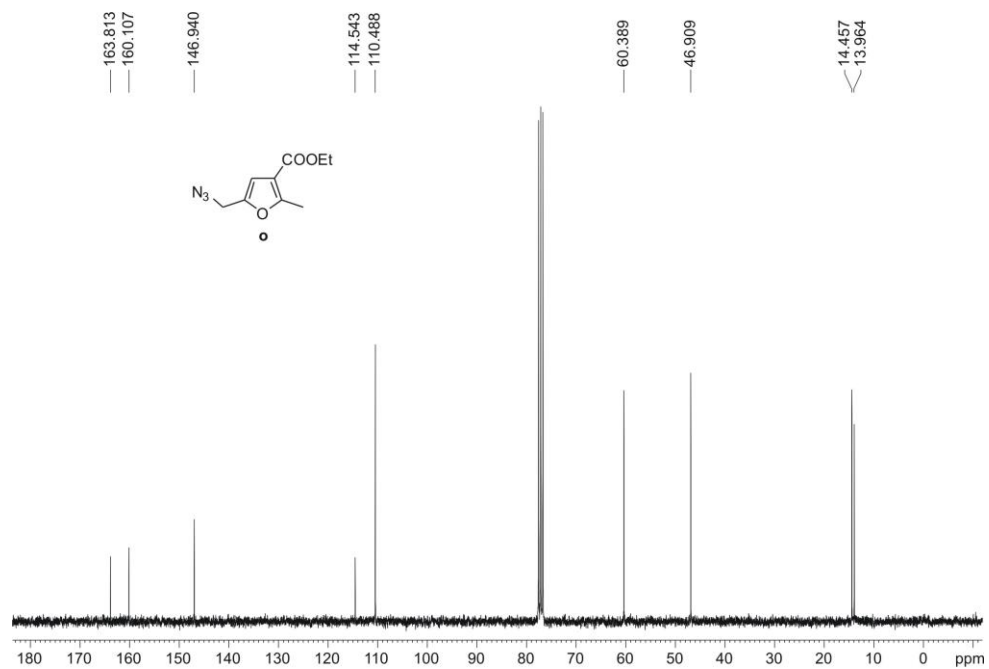

$^{13}\text{C}$  NMR (75.4 MHz,  $\text{CDCl}_3$ )

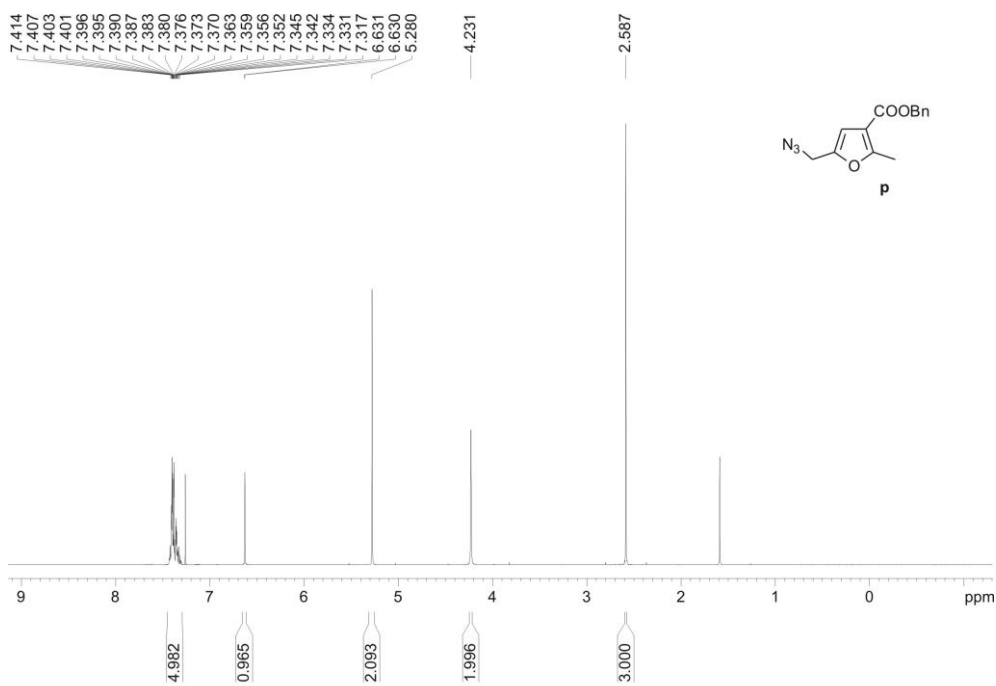

$^1\text{H}$  NMR (300 MHz,  $\text{CDCl}_3$ )

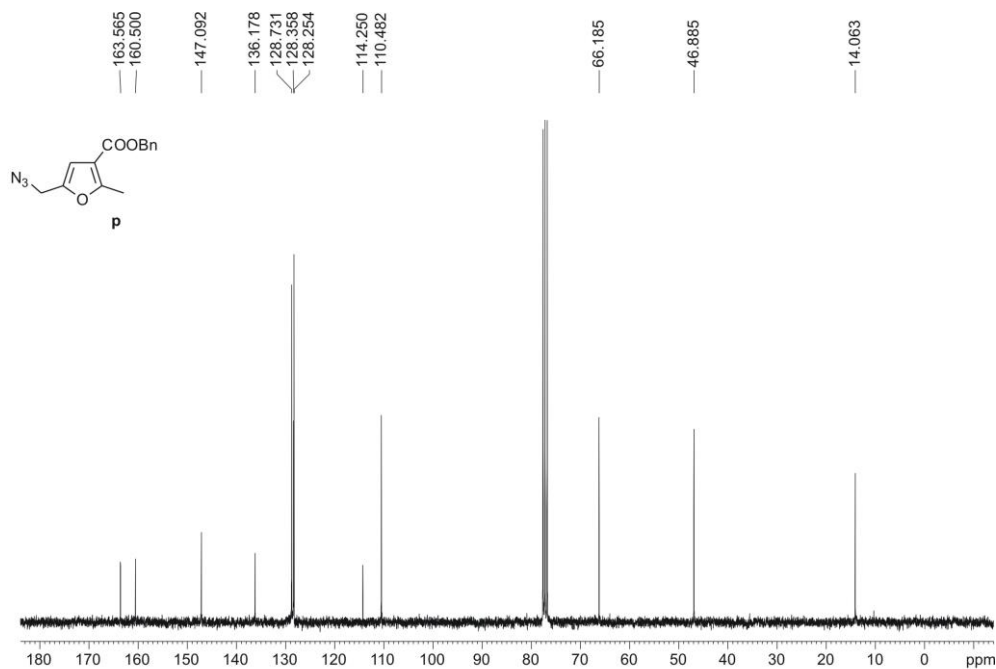

$^{13}\text{C}$  NMR (75.4 MHz,  $\text{CDCl}_3$ )
